# Supplementary material for: Single Session Imaging of Cerebellum at 7 Tesla: Obtaining Structure and Function of Multiple Motor Subsystems in Individual Subjects
Source: PubMed Central journal article supplement (PMC4530960; doi:10.1371/journal.pone.0134933), 2015-08-10
Supplement: pone.0134933.s004.pdf [file pone.0134933.s004.pdf]

| Pro- versus Anti-Saccades (PA) |                         |                 |                          |
|--------------------------------|-------------------------|-----------------|--------------------------|
|                                | Individual AT           | Individual SPMT | NM AT                    |
| S01                            | -3.1429 > T ><br>2.5904 | +/- 5.4639      | -3.1167 > T > 3.4231     |
| S02                            | -3.4712 > T ><br>3.7725 | +/- 5.4526      | -4.3929 > T > 6.0207     |
| S03                            | -3.8611 > T ><br>3.4088 | +/- 5.4663      | -3.2799 > T > 3.3436     |
| S04                            | -3.3081 > T ><br>2.9102 | +/- 5.4745      | -3.4342 > T > 3.6921     |
| S05                            | -3.4524 > T ><br>3.1405 | +/- 5.4666      | -2.8138 > T > 2.6274     |
| S05<br>(head)                  | -4.0821 > T ><br>2.8409 | +/- 5.4683      | -3.4788 > T > 3.1093     |
| S06                            | -3.2053 > T ><br>3.2128 | +/- 5.4574      | -2.5708 > T > 3.0297     |
| S07                            | T > 2.8495              | +/- 5.4605      | -2.6720 > T > 3.8937     |
| Finger Tapping (FT)            |                         |                 |                          |
|                                | Individual AT           | Individual SPMT | NM AT                    |
| S01                            | -3.1252 > T ><br>2.9928 | +/- 5.4632      | T > 3.682                |
| S02                            | -3.6386 > T ><br>3.9201 | +/- 5.4517      | -2.6404 > T > 4.8500     |
| S03                            | -3.1687 > T ><br>2.7985 | +/- 5.4587      | -3.3849 > T > 2.7447     |
| S04                            | -3.2823 > T ><br>2.8444 | +/- 5.4644      | --                       |
| S05                            | -3.8687 > T ><br>3.1489 | +/- 5.7991      | T > 2.4075               |
| S05<br>(head)                  | T > 3.9093*             | +/- 5.4679*     | -1.8802 > T ><br>2.5988* |
| S06                            | -3.2650 > T ><br>2.7914 | +/- 5.4581      | -3.3780 > T > 3.0243     |
| S07                            | --                      | +/- 5.4628      | T > 2.5909               |
